# Supplementary material
Source: MDPI journal article supplement (https://www.mdpi.com/2079-6412/11/2/135)
Supplement: s1 [file s1]

# Supplementary Materials: TEOS-Based Superhydrophobic Coating for the Protection of Stone-Built Cultural Heritage

Fotios G. Adamopoulos <sup>1,2</sup>, Evangelia C. Vouvoudi <sup>1</sup>, Eleni Pavlidou <sup>3</sup>, Dimitris S. Achilias <sup>1,\*</sup> and Ioannis Karapanagiotis <sup>2,\*</sup>

<sup>1</sup> Laboratory of Polymers and Dyes Chemistry and Technology, Department of Chemistry, Aristotle University of Thessaloniki, GR-54124 Thessaloniki, Greece; r2r5r1r5r7@yahoo.gr (F.G.A.); evouvoud@chem.auth.gr (E.C.V.)

<sup>2</sup> Department of Management and Conservation of Ecclesiastical Cultural Heritage Objects, University Ecclesiastical Academy of Thessaloniki, GR-54250 Thessaloniki, Greece

<sup>3</sup> Department of Physics, Aristotle University of Thessaloniki, GR-54124 Thessaloniki, Greece; elpavlid@auth.gr

\* Correspondence: axilias@chem.auth.gr (D.S.A.); y.karapanagiotis@aeath.gr (I.K.)

## 1. SEM-EDS and XRD Characterization of Marble

Marble specimens were studied using SEM-EDS and XRD. Indicative results are provided in Figures S1 and S2, respectively. The SEM-EDX results reveal the significant concentration of calcium and magnesium. This result is in agreement with the dolomitic character of Thassos marble. Furthermore, the prominent peak at 30.99° in the XRD spectrum of Figure S2 occurs in dolomite samples [1]. Other peaks detected in the XRD spectrum which support the dolomitic character of the sample are recorded at 41.25°, 50.65° and 51.12° [2].

**Citation:** Adamopoulos, F.G.; Vouvoudi, E.C.; Pavlidou, E.; Achilias D.S.; Karapanagiotis, I. TEOS-Based Superhydrophobic Coating for the Protection of Stone-Built Cultural Heritage. *Coatings* **2021**, *11*, 135. <https://doi.org/10.3390/coatings11020135>

Academic editor: Mara Camaiti  
Received: 17 December 2020  
Accepted: 21 January 2021  
Published: 27 January 2021

**Publisher's Note:** MDPI stays neutral with regard to jurisdictional claims in published maps and institutional affiliations.

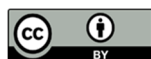

**Copyright:** © 2021 by the authors. Submitted for possible open access publication under the terms and conditions of the Creative Commons Attribution (CC BY) license (<http://creativecommons.org/licenses/by/4.0/>).

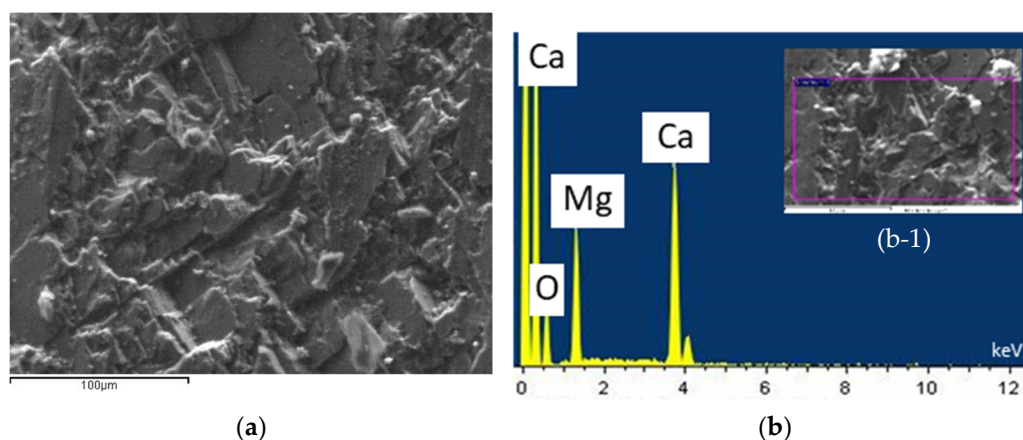

**Figure S1.** (a) SEM image of bare, uncoated piece of Thassos marble. (b) SEM-EDS analysis of uncoated marble. (b-1) The scan area is designated by the box in the image.

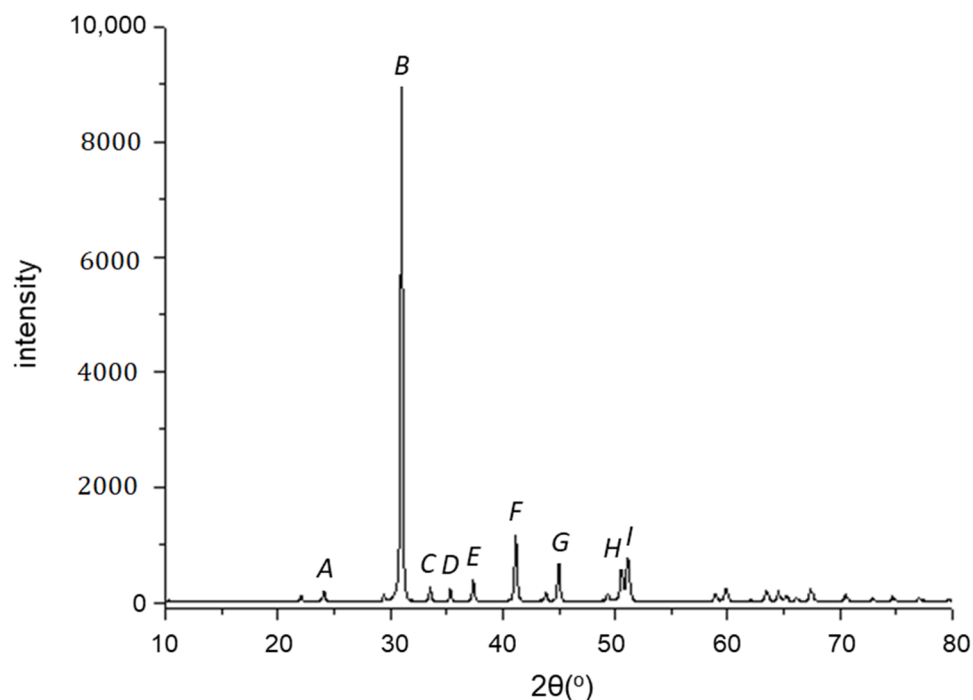

**Figure S2.** XRD analysis of uncoated marble. The major peaks are  $A = 24.01^\circ$ ,  $B = 30.99^\circ$ ,  $C = 33.64^\circ$ ,  $D = 35.46^\circ$ ,  $E = 37.38^\circ$ ,  $F = 41.25^\circ$ ,  $G = 44.97^\circ$ ,  $H = 50.65^\circ$ ,  $I = 51.12^\circ$ ,  $J = 59.92^\circ$ .

## 2. SEM-EDS Characterization of Coated Marble

The surfaces of coated marble samples were investigated using SEM-EDS. An example from this study is provided in Figure S3. To produce the sample of Figure S3, the TEOS-FAS sol was sprayed onto marble. Elevated concentrations of silicon (Si) and fluorine (F) were recorded suggesting a uniform coverage of marble by the TEOS-FAS coating. Other elements recorded at elevated concentrations were calcium (Ca), magnesium (Mg) and oxygen (O) and were originated from the marble substrate, as revealed in Figure S1.

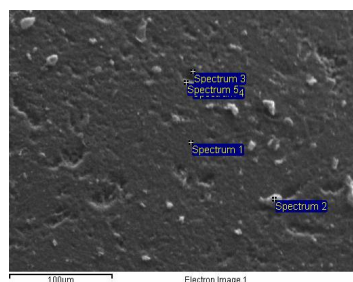

| Spectrum * | O     | F     | Mg    | Si    | Ca    | Total |
|------------|-------|-------|-------|-------|-------|-------|
| 1          | 44.09 | 17.83 | 12.96 | 12.90 | 12.22 | 100   |
| 2          | 35.79 | 29.07 | 2.50  | 30.07 | 2.57  | 100   |
| 3          | 32.92 | 14.95 | 7.11  | 22.84 | 22.18 | 100   |
| 4          | 46.98 | 16.66 | 12.03 | 13.86 | 10.47 | 100   |
| 5          | 42.72 | 17.00 | 13.46 | 14.46 | 12.35 | 100   |

\* Carbon (C) is excluded from the given results.

**Figure S3.** Indicative SEM-EDS results for coated marble. The wt.% percentages are shown in the table. In this case the coating was applied by spraying.

## References

1. Tengku Mustafa, T.N.A.S.; Munusamy, S.R.R.; Uy Lan, D.N.; Yunos, N.F.M. Physical and structural transformations of perlis carbonate rocks via mechanical activation route. *Procedia. Chem.* **2016**, *19*, 673–680.
2. Kaczmarek, S.E.; Gregg, J.M.; Bish, D.L.; Machel, H.G.; Fouke, B. Dolomite, very high-magnesium calcite, and microbes-implications for the microbial model of dolomitization. *SEPM Spec. Publ.* **2017**, *109*, 7–20.
